# Supplementary material
Source: HighWire-hosted journal article supplement (https://erj.ersjournals.com/content/61/2/2202070)
Supplement: inline-supplementary-material-1 [file inline-supplementary-material-1.pdf]

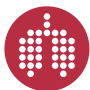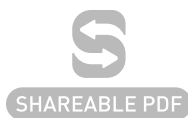

# The puzzles of lung function interpretation

Riccardo Pellegrino<sup>1</sup> and Vito Brusasco<sup>2</sup>

<sup>1</sup>Centro Medico Pneumologico Torino, Torino, Italy. <sup>2</sup>Respiratory Medicine, University of Genoa, Genoa, Italy.

Corresponding author: Riccardo Pellegrino ([info@pneumotorino.it](mailto:info@pneumotorino.it))

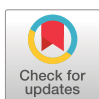

Shareable abstract (@ERSpublications)

**It is time to open a frank discussion about important discrepancies between lung function and clinical documents on respiratory diseases** <https://bit.ly/3VJeMLY>

**Cite this article as:** Pellegrino R, Brusasco V. The puzzles of lung function interpretation. *Eur Respir J* 2023; 61: 2202070 [DOI: 10.1183/13993003.02070-2022].

This single-page version can be shared freely online.

Copyright ©The authors 2023.  
For reproduction rights and  
permissions contact  
[permissions@ersnet.org](mailto:permissions@ersnet.org)

Received: 21 Nov 2022  
Accepted: 26 Nov 2022

## To the Editor:

The publication of the recent European Respiratory Society/American Thoracic Society technical document on lung function interpretation [1] marks a fundamental step in respiratory medicine that consolidates the scientific work initiated in 1983 and regularly updated over the following years up to the present. Briefly, the new document [1], along with the analogous document from 2005 [2], are grounded on objective scientific principles that remove opinion-based sources of bias in the analysis and interpretation of the data. As in other medical disciplines, this is a prerequisite for optimising the diagnosis and treatment of diseases, planning robust clinical trials, implementing health policy and containing healthcare costs. Recognition of this service all over the world is a marker of the top quality of the commitment of the European Respiratory Society to respiratory medicine.
